# Supplementary material for: Evaluating the electrocatalytic activity of flower-like Co-MOF/CNT nanocomposites for methanol oxidation in basic electrolytes
Source: Royal Society of Chemistry journal article supplement (doi:10.1039/d3ra05105f), 2023-01-01
Supplement: d3ra05105f1.pdf [file d3ra05105f1.pdf]

## **Evaluating the Electrocatalytic Activity of Flower-like Co-MOF/CNTs Nanocomposites for Methanol Oxidation in Basic Electrolyte**

*Amna A. Kotp<sup>1</sup>, Abdalla Abdelwahab<sup>2,1</sup>, Ahmed A. Farghali<sup>1</sup>, Waleed M.A. El Rouby<sup>1</sup>,  
Abeer Enaiet Allah<sup>3,\*</sup>*

<sup>1</sup> Materials Science and Nanotechnology Department, Faculty of Postgraduate Studies for  
Advanced Sciences, Beni-Suef University, Beni-Suef 62511, Egypt.

<sup>2</sup> Faculty of Science, Galala University, Sokhna, Suez 43511, Egypt.

<sup>3</sup> Chemistry Department, Faculty of Science, Beni-Suef University, Beni-Suef 62511,  
Egypt.

\* Corresponding Author: E-mail: [abeer.abdelaal@science.bsu.edu.eg](mailto:abeer.abdelaal@science.bsu.edu.eg)

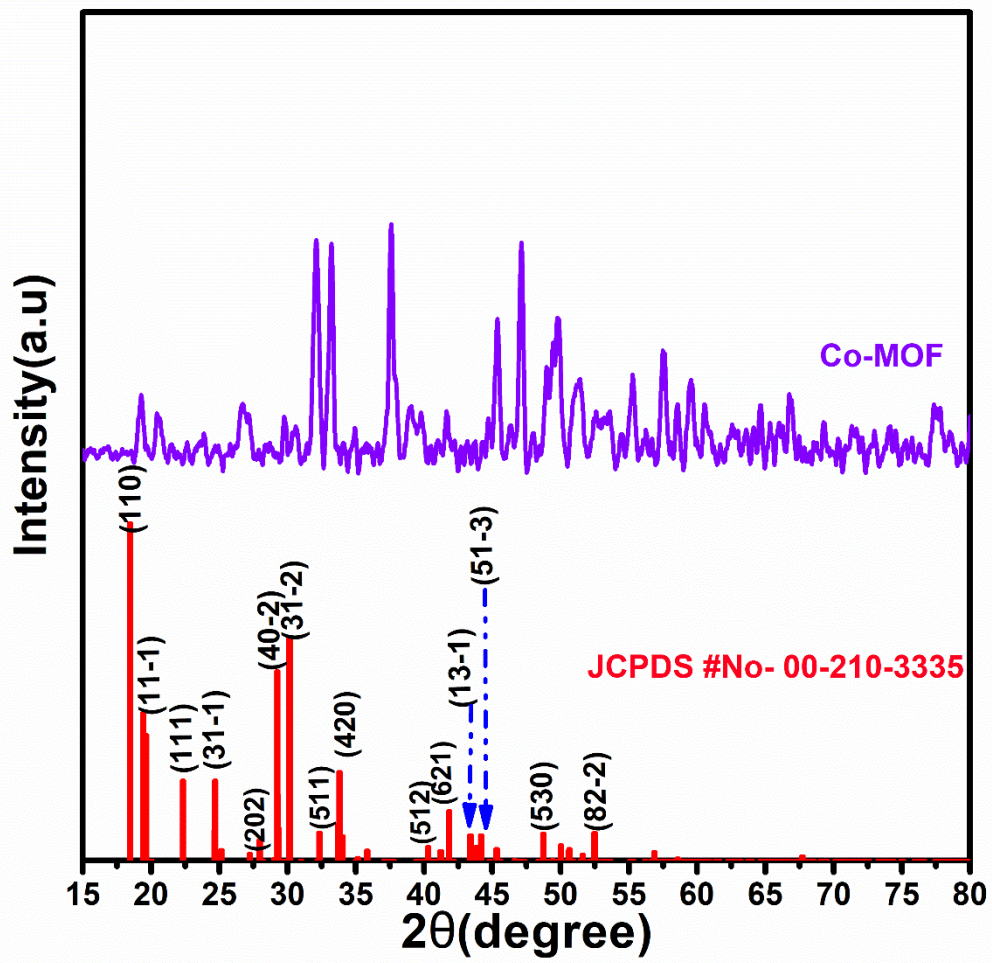

Fig.S1: XRD patterns of Co-MOF ,and its JCPDS card .

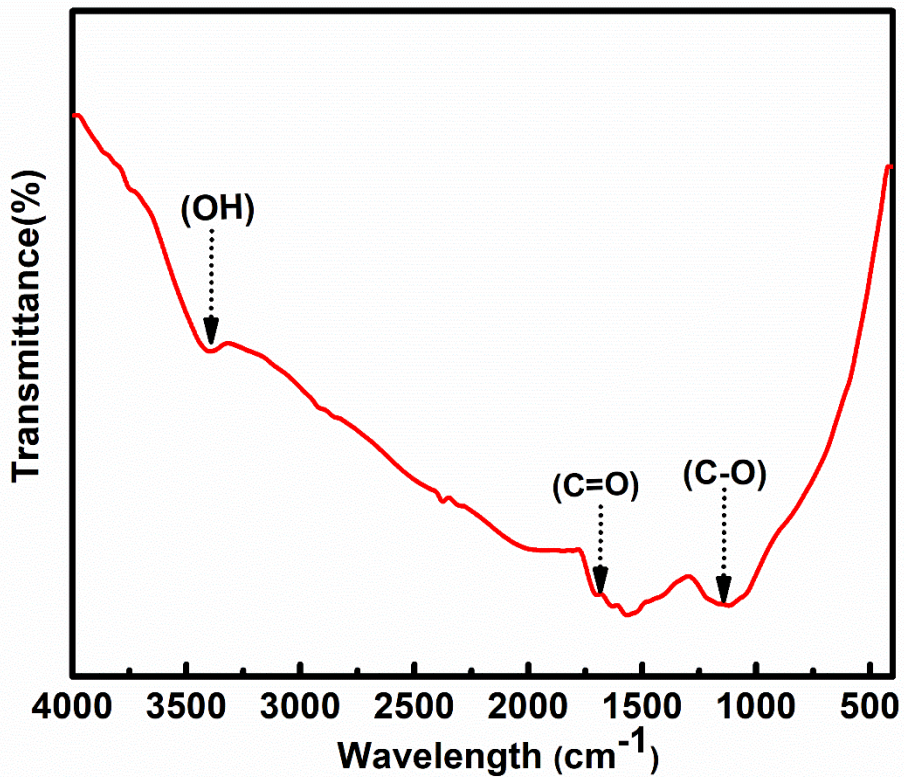

Fig.S2: FT-IR spectra of the CNTs.

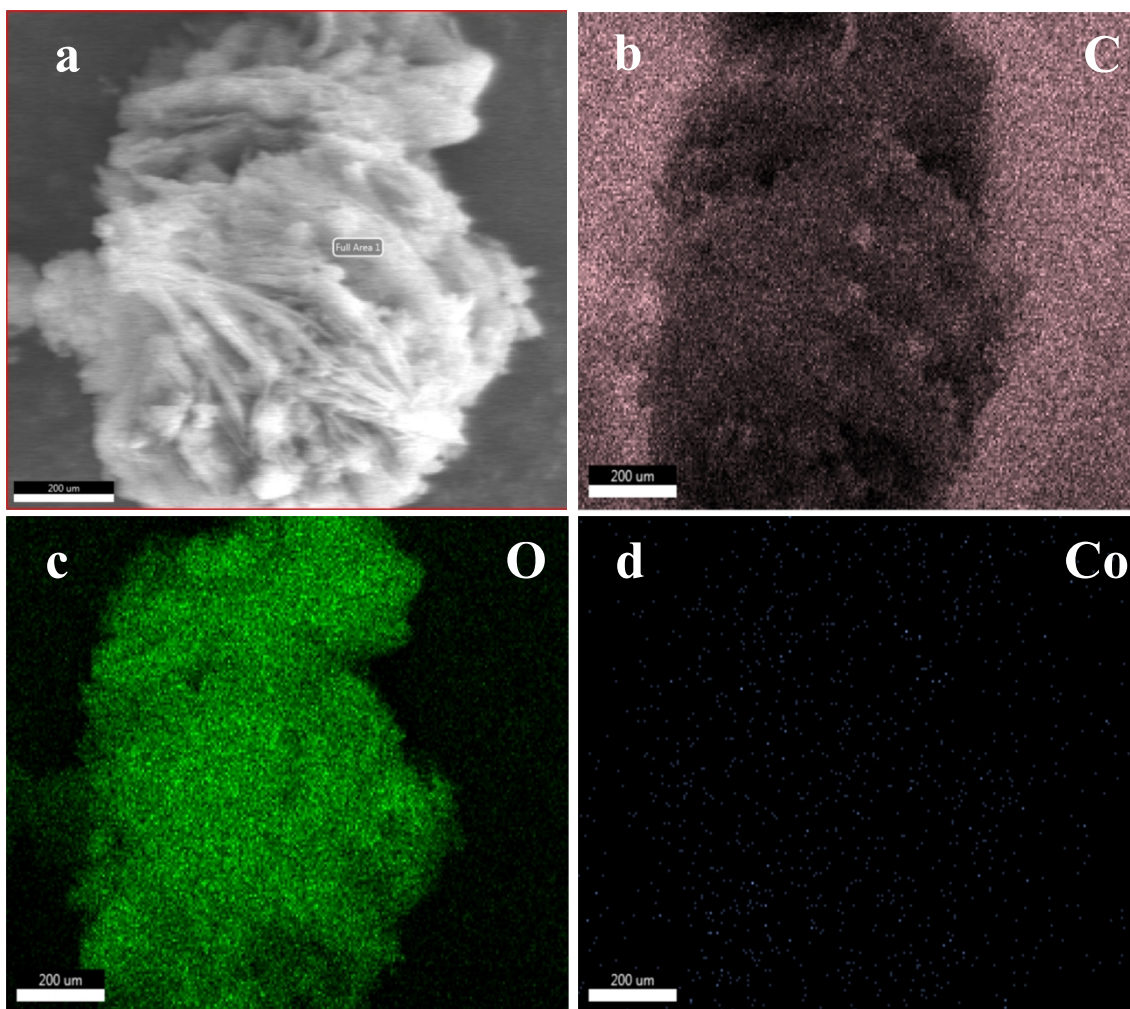

**Fig.S3:** Elemental mapping analysis of the Co-MOF/50%CNT Catalyst.

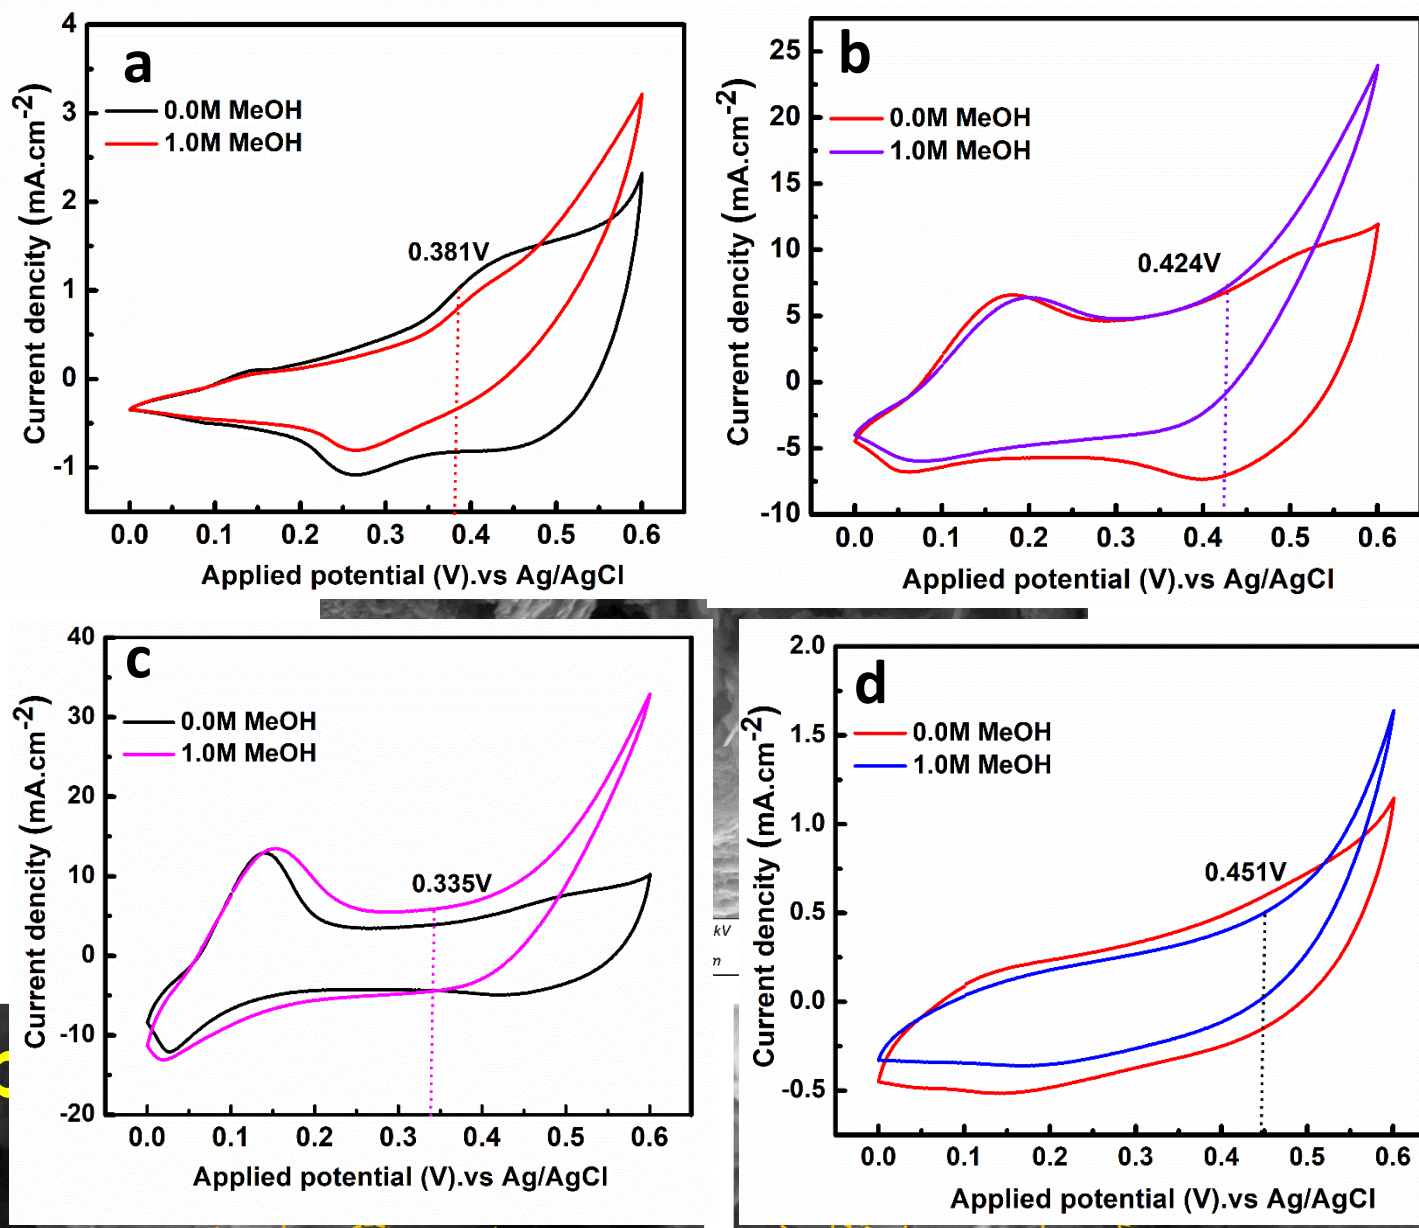

Fig S4: CV curves of (a) Co-MOF, (b) Co-MOF/25%CNT, (c) Co-MOF/50%CNT, and (d) Co-MOF/75%CNT catalysts in 0.5M NaOH with and without 1.0M MeOH at a scan rate  $50 \text{ mV}\cdot\text{s}^{-1}$ .

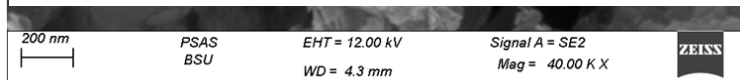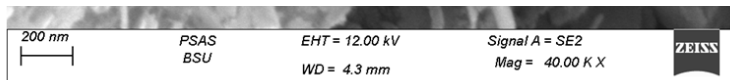

Fig S5: (a-c) FESEM images of Co-MOF/50%CNTs after methanol oxidation reaction at  $50 \text{ mV}\cdot\text{s}^{-1}$  in 0.5M NaOH and 1M methanol.
